# Supplementary material for: Increased Intake of Both Caffeine and Non-Caffeine Coffee Components Is Associated with Reduced NAFLD Severity in Subjects with Type 2 Diabetes
Source: MDPI journal article supplement (doi:10.3390/nu15010004), 2022-12-20
Supplement: s1 [file s1]

# Increased intake of both caffeine and non-caffeine coffee components is associated with reduced NAFLD severity in subjects with type 2 diabetes

Margarida Coelho <sup>†</sup>, Rita S. Patarrão <sup>†</sup>, Inês Sousa-Lima, Rogério T. Ribeiro, Maria João Meneses, Rita Andrade, Vera M. Mendes, Bruno Manadas, João Filipe Raposo, M. Paula Macedo and John G. Jones\*

<sup>†</sup>Joint first authors

\*Corresponding author

## Supplementary material

**Table S1.** Quantities of selected caffeine and non-caffeine metabolites measured from 24 h urine collections. Values are expressed as mean  $\pm$  standard deviation.

| Caffeine metabolites            | Daily amount (mg) | Percentage relative to total (%) |
|---------------------------------|-------------------|----------------------------------|
| Caffeine                        | 4.95 $\pm$ 5.05   | 8.80 $\pm$ 5.20                  |
| Paraxanthine                    | 49.48 $\pm$ 43.38 | 87.44 $\pm$ 9.26                 |
| Theobromine                     | 53.37 $\pm$ 81.11 | -                                |
| Theophylline                    | 0.93 $\pm$ 0.83   | 3.76 $\pm$ 8.76                  |
| <b>Non-caffeine metabolites</b> |                   |                                  |
| Trigonelline                    | 26.06 $\pm$ 20.32 | 94.65 $\pm$ 4.55                 |
| <i>p</i> -Coumaric acid         | 0.16 $\pm$ 0.14   | 0.97 $\pm$ 1.26                  |
| trans-Caffeic acid              | 1.00 $\pm$ 0.9    | 4.38 $\pm$ 3.71                  |

**Table S2:** Correlations, expressed as Pearson coefficients, of individual caffeine and non-caffeine metabolites (total amount recovered in 24-hour urine) and reported espresso coffee consumption (cups per day). The *p* value for each Pearson coefficient is shown alongside in parentheses.

| <b>Caffeine metabolites</b>     | <b>Correlation with cups of espresso per day</b> |
|---------------------------------|--------------------------------------------------|
| Caffeine                        | 0.2859** ( <i>p</i> =0.0045)                     |
| Paraxanthine                    | 0.4301**** ( <i>p</i> <0.0001)                   |
| Theophylline                    | 0.3397*** ( <i>p</i> =0.0007)                    |
| <b>Non-caffeine metabolites</b> |                                                  |
| Trigonelline                    | 0.3444*** ( <i>p</i> =0.0006)                    |
| <i>p</i> -Coumaric acid         | 0.08741 ( <i>p</i> =0.3946)                      |
| Caffeic acid                    | 0.4033**** ( <i>p</i> <0.0001)                   |

**Table S3:** Multiple regression analysis for fatty liver index (FLI) and urinary coffee metabolites (total caffeine metabolites, top table and total non-caffeine metabolites, bottom table) normalized to fat-free mass.

| <b>Dependent variable: FLI</b>   |                     |             |          |                |
|----------------------------------|---------------------|-------------|----------|----------------|
| <b>Explanatory variables</b>     | <b>Coefficients</b> | <b>S.E.</b> | <b>t</b> | <b>p value</b> |
| Intercept                        | 82.585              | 30.227      | 2.732    | 0.008          |
| HbA1c                            | 2.371               | 1.733       | 1.368    | 0.175          |
| Sex                              | 4.279               | 6.032       | 0.709    | 0.480          |
| Age                              | -0.304              | 0.296       | -1.029   | 0.307          |
| Alcohol consumption              | -0.145              | 0.158       | -0.919   | 0.361          |
| Glomerular filtration rate (GFR) | -0.184              | 0.193       | -0.953   | 0.343          |
| Total caffeine metabolites       | -2.507              | 1.090       | -2.301   | 0.024*         |
| R <sup>2</sup>                   | 0.147               |             |          |                |
| Adjusted R <sup>2</sup>          | 0.081               |             |          |                |
| F-statistic                      | 2.233               |             |          |                |
| Significance F                   | 0.049*              |             |          |                |

  

| <b>Dependent variable: FLI</b>   |                     |             |          |                |
|----------------------------------|---------------------|-------------|----------|----------------|
| <b>Explanatory variables</b>     | <b>Coefficients</b> | <b>S.E.</b> | <b>t</b> | <b>p value</b> |
| Intercept                        | 98.660              | 28.909      | 3.413    | 0.001          |
| HbA1c                            | 2.415               | 1.669       | 1.447    | 0.152          |
| Sex                              | -0.586              | 5.903       | -0.099   | 0.921          |
| Age                              | -0.339              | 0.284       | -1.193   | 0.237          |
| Alcohol consumption              | -0.176              | 0.152       | -1.155   | 0.251          |
| Glomerular filtration rate (GFR) | -0.247              | 0.181       | -1.366   | 0.176          |
| Total non-caffeine metabolites   | -7.057              | 2.091       | -3.375   | 0.001***       |
| R <sup>2</sup>                   | 0.205               |             |          |                |
| Adjusted R <sup>2</sup>          | 0.144               |             |          |                |
| F-statistic                      | 3.348               |             |          |                |
| Significance F                   | 0.005**             |             |          |                |

**Table S4:** Multiple regression analysis for fatty liver index (FLI) and urinary coffee metabolites (total caffeine metabolites, top table and total non-caffeine metabolites, bottom table), normalized to total body weight.

| <b>Dependent variable: FLI</b>   |                     |             |          |                |
|----------------------------------|---------------------|-------------|----------|----------------|
| <b>Explanatory variables</b>     | <b>Coefficients</b> | <b>S.E.</b> | <b>t</b> | <b>p value</b> |
| Intercept                        | 77.949              | 30.306      | 2.572    | 0.012          |
| HbA1c                            | 2.439               | 1.724       | 1.415    | 0.161          |
| Sex                              | 6.099               | 6.093       | 1.001    | 0.320          |
| Age                              | -0.294              | 0.294       | -1.000   | 0.320          |
| Alcohol consumption              | -0.131              | 0.157       | -0.836   | 0.406          |
| Glomerular filtration rate (GFR) | -0.167              | 0.193       | -0.868   | 0.388          |
| Total caffeine metabolites       | -9.375              | 3.737       | -2.508   | 0.014*         |
| R <sup>2</sup>                   | 0.157               |             |          |                |
| Adjusted R <sup>2</sup>          | 0.092               |             |          |                |
| F-statistic                      | 2.415               |             |          |                |
| Significance F                   | 0.034*              |             |          |                |

  

| <b>Dependent variable: FLI</b>   |                     |             |          |                |
|----------------------------------|---------------------|-------------|----------|----------------|
| <b>Explanatory variables</b>     | <b>Coefficients</b> | <b>S.E.</b> | <b>t</b> | <b>p value</b> |
| Intercept                        | 98.284              | 28.586      | 3.438    | 0.001          |
| HbA1c                            | 2.382               | 1.649       | 1.444    | 0.153          |
| Sex                              | 1.059               | 5.766       | 0.184    | 0.855          |
| Age                              | -0.348              | 0.281       | -1.239   | 0.219          |
| Alcohol consumption              | -0.165              | 0.150       | -1.097   | 0.276          |
| Glomerular filtration rate (GFR) | -0.255              | 0.178       | -1.429   | 0.157          |
| Total non-caffeine metabolites   | -28.134             | 7.700       | -3.654   | 0.0005***      |
| R <sup>2</sup>                   | 0.222               |             |          |                |
| Adjusted R <sup>2</sup>          | 0.162               |             |          |                |
| F-statistic                      | 3.706               |             |          |                |
| Significance F                   | 0.003**             |             |          |                |

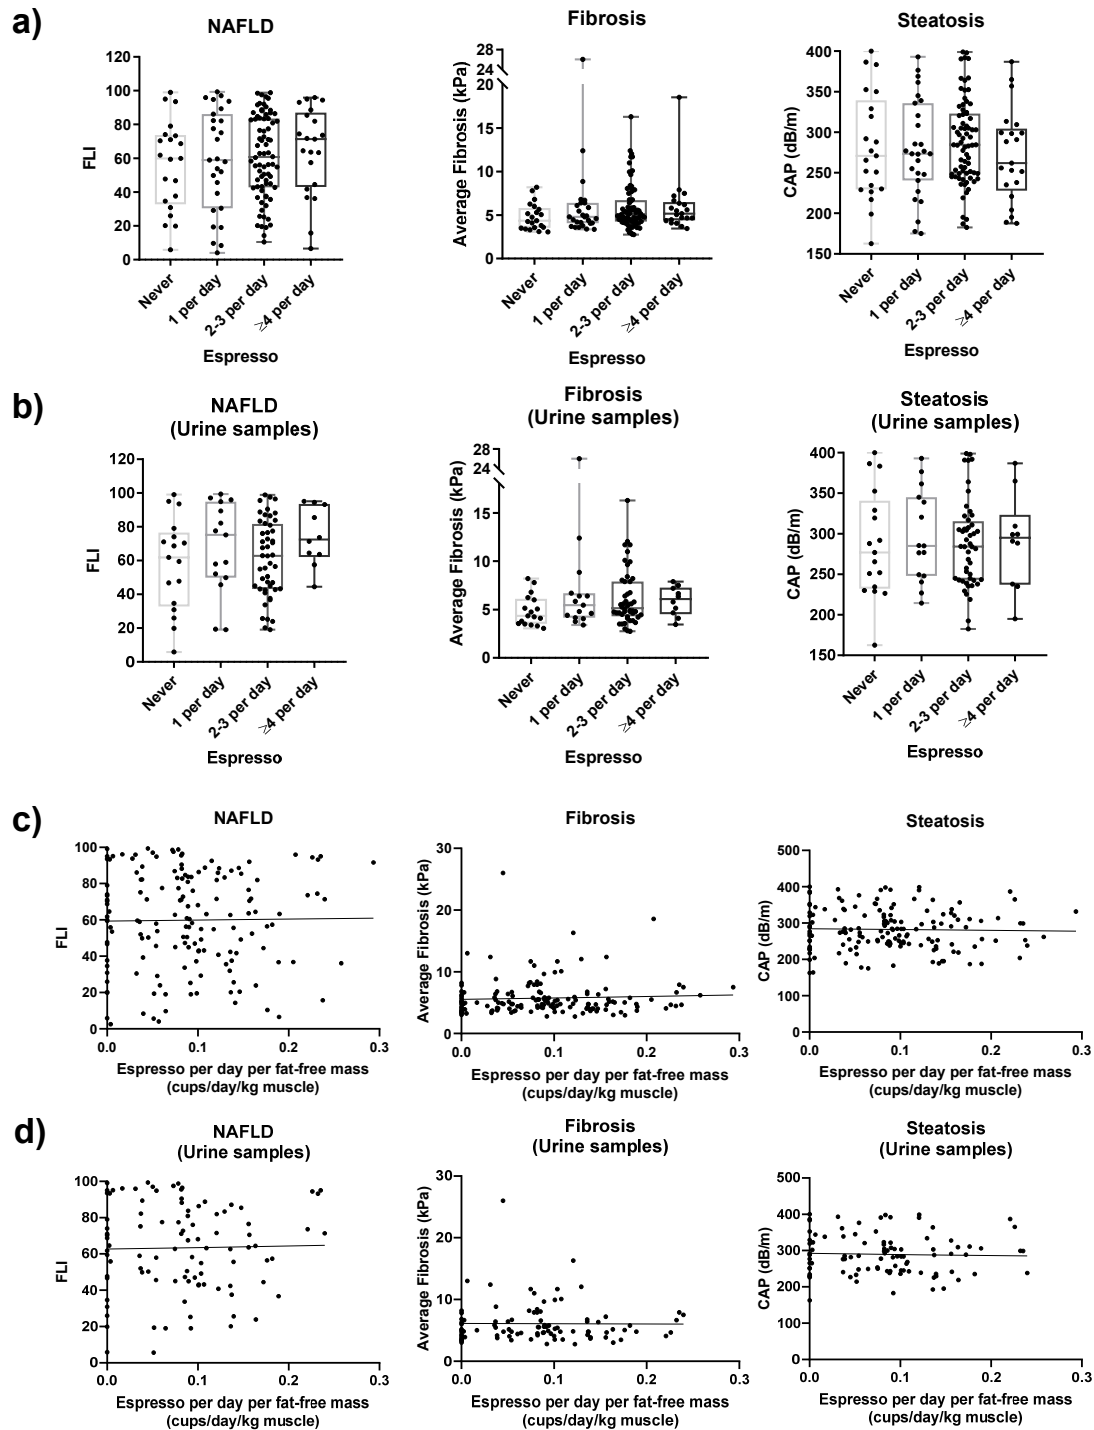

**Figure S1:** No significant associations were found between self-reported coffee consumption, either adjusted (c,d) or non-adjusted for fat-free mass (a,b), and any NAFLD parameter either for the cohort that provided the 24-hour urine samples (b,d) or for the entire study population (a,c). Non-significant according to Mann-Whitney test for a and b. Non-significant according to Pearson correlation for c and d.

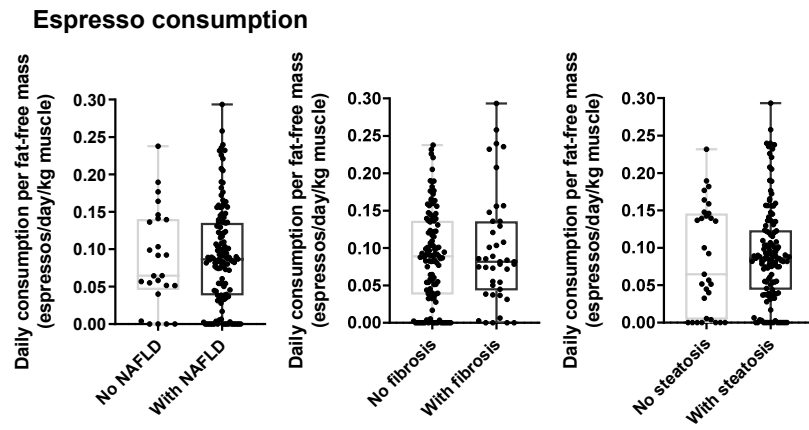

**Figure S2:** Levels of espresso consumption, adjusted for fat-free mass with different categories of the fatty liver index (FLI) and scores of fibrosis and steatosis obtained by Fibroscan®. Non-significant according to Mann-Whitney test.

### Theophylline/Paraxanthine

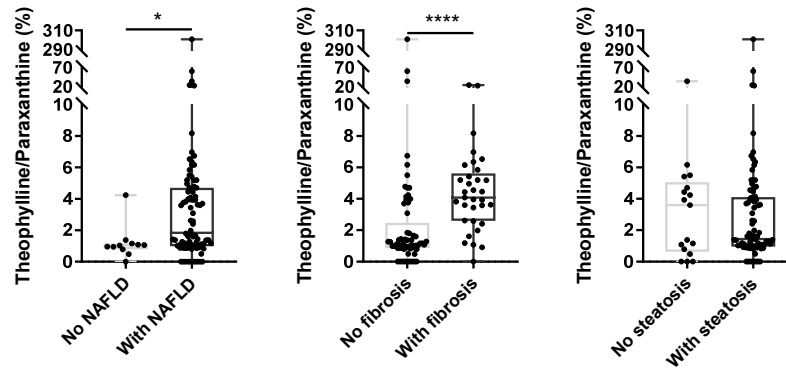

**Figure S3:** Ratio of theophylline abundance by paraxanthine with different categories of the fatty liver index (FLI) and scores of fibrosis and steatosis obtained by Fibroscan®. \* = significant difference ( $p \leq 0.05$ , Mann-Whitney test); \*\*\*\* = significant difference ( $p \leq 0.0001$ , Mann-Whitney test).
